# Supplementary material for: Structural analysis of group II chitinase (ChtII) catalysis completes the puzzle of chitin hydrolysis in insects
Source: PubMed Central journal article supplement (PMC5827449; doi:10.1074/jbc.ra117.000119), 2018-01-09
Supplement: supp_RA117.000119_132660_2_supp_48905_p22lkz.pdf [file supp_RA117.000119_132660_2_supp_48905_p22lkz.pdf]

**SUPPLEMENTAL DATA**

**Structural analysis of group II chitinase (ChtII) catalysis completes the puzzle of chitin hydrolysis in insects**

**Wei Chen<sup>1,#</sup>, Mingbo Qu<sup>1,#</sup>, Yong Zhou<sup>1</sup>, Qing Yang<sup>1,2,\*</sup>**

<sup>1</sup>State Key Laboratory of Fine Chemical Engineering, School of Life Science and Biotechnology and School of Software, Dalian University of Technology, 2 Linggong Road, Dalian 116024, China;

<sup>2</sup>Institute of Plant Protection, Chinese Academy of Agricultural Sciences, 2 West Yuanmingyuan Road, Beijing 100193, China.

Supplementary Table S1

Supplementary Figure S1

Supplementary Figure S2

Supplementary Figure S3

Supplementary Figure S4

Supplementary Figure S5

Supplementary Figure S6

**Table S1.** Primers used during cloning and RT-PCR

| PCR fragment/<br>Conserved sequence | Primer        | Sequence (5'-3')           |
|-------------------------------------|---------------|----------------------------|
| D1                                  | D1-F-outer    | CTTGGGCGATAGACTTGGACGAC    |
|                                     | D1-R-outer    | GGRTACTCCCAGTSGAKGTC       |
|                                     | D1-F-inner    | TGTGAGAAGTTCTACGTTTGCCTGA  |
|                                     | D1-R-inner    | CCAGTSGAKGTCCAKYCCGTCRAA   |
| 3-1                                 | 3R1-outer     | TGCAACTCAACGATGAAGTTCT     |
|                                     | 3R1-inner     | GTACGCAATGCTCCCGACTGACT    |
| 3-2                                 | 3R2-outer     | AGTGCCAGTTTTAGCTCGCCTTCT   |
|                                     | 3R2-inner     | CCAACGGCCTTAATATTCCTGTC    |
| 5-1                                 | 5R1-outer     | AGACGGGTTTTGTAGGCTTAGAGG   |
|                                     | 5R1-inner     | GAGTTGCATAGAGGTAGATTCCC    |
| D2                                  | D2-F-outer    | GGAMHGACTCVSHAGGVGAYAARTA  |
|                                     | D2-R-outer    | TAGTGGTGGTCGTGCTGGGCGT     |
|                                     | D2-F-inner    | TTGGAACTATCCCGTTTGCTGGC    |
|                                     | D2-R-inner    | CACAGCAGCGGTTGTTGAAGTC     |
| 5-2                                 | 5R2-outer     | CGCCACCTTTTAGAAGAGCTTTGAT  |
|                                     | 5R2-inner     | CAGGAACAAGTGGGGTATGATGCC   |
| 5-3                                 | 5R3-outer     | CATAATTCGCCTTATCGGACGCTG   |
|                                     | 5R3-inner     | GAAGTTGTGCATGCGCAGGAAAGGTA |
| 5-4                                 | 5R4-outer     | CCCAATCCAAGGAGTACTTTGACG   |
|                                     | 5R4-inner     | GTCGGTCCCTTCGACAGCATT      |
| 5-5                                 | 5R5-outer     | ATACACTTAGCGACATCCAAATGACC |
|                                     | 5R5-inner     | CGTTGAAATGGTGCTCAGTATTGGGA |
| 5-6                                 | 5R6-outer     | GTCGAATAATGCGAATGAATTGCCAG |
|                                     | 5R6-inner     | TGCCAGCTTCATCGAATGCAACCAC  |
| ChtII full length                   | ChtII-F-outer | TCGCGACACGCACGGCCTAAACGCA  |
|                                     | ChtII-R-outer | ACGGCCTAAACGCAGGCGCATCTTC  |
|                                     | ChtII-F-inner | GCAAGTACCTATATTGAACG       |
|                                     | ChtII-R-inner | GCTAGCGTGGCTATTCCTAGTCTAA  |

## Supplementary Figure

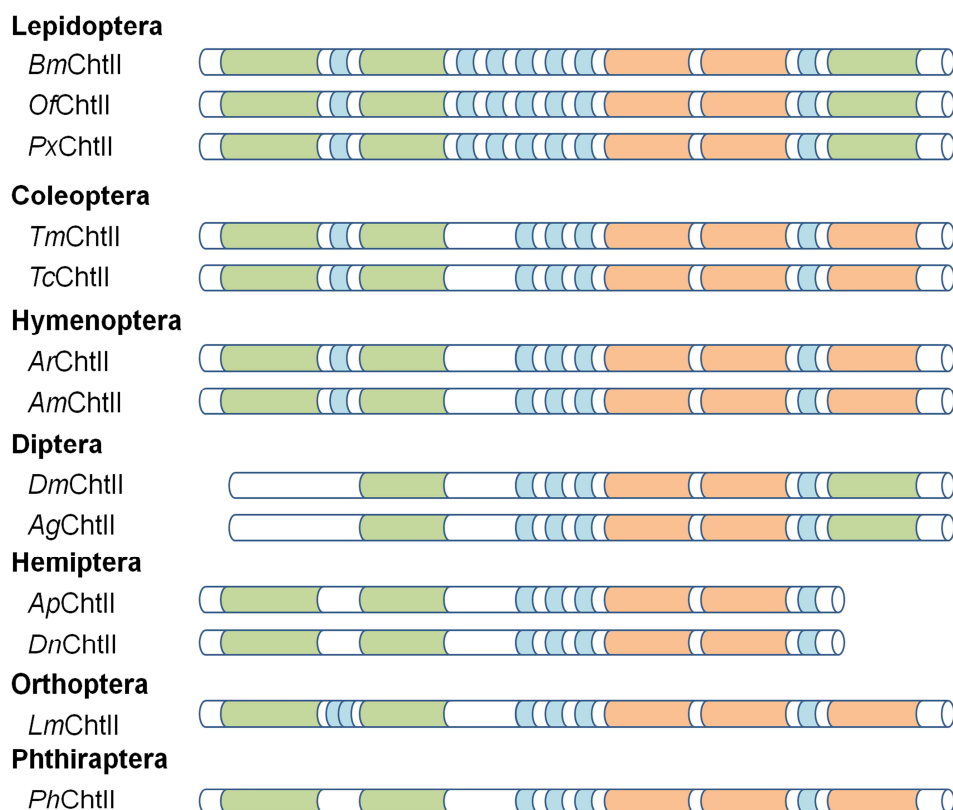

**Figure S1.** Domain organization of group II chitinases in different insect orders. Active catalytic domains, inactive catalytic domains, chitin binding domains and linker regions are highlighted in orange, green, blue and white, respectively. Group II chitinases compared are: *BmChtII*, *Bombyx mori* (BGIBMGA006874-TA); *PxChtII*, *Plutella xylostella* (XP\_001655973.1); *TmChtII*, *Tenebrio molitor* (CAD31740.4); *TcChtII*, *Tribolium castaneum* (NP\_001036067.1); *ArChtII*, *Athalia rosae* (XP\_012269359.1); *AmChtII*, *Apis mellifera* (XP\_006570346.1); *DmChtII*, *Drosophila melanogaster* (NP\_001036422.1); *AgChtII*, *Anopheles gambiae* (XP\_001238192.2); *ApChtII*, *Acyrtosiphon pisum* (XP\_001943038.1); *DnChtII*, *Diuraphis noxia* (XP\_015370321.1); *LmChtII*, *Locusta migratoria* (AMT75074.1); *PhChtII*, *Pediculus humanus corporis* (XP\_002426510.1).

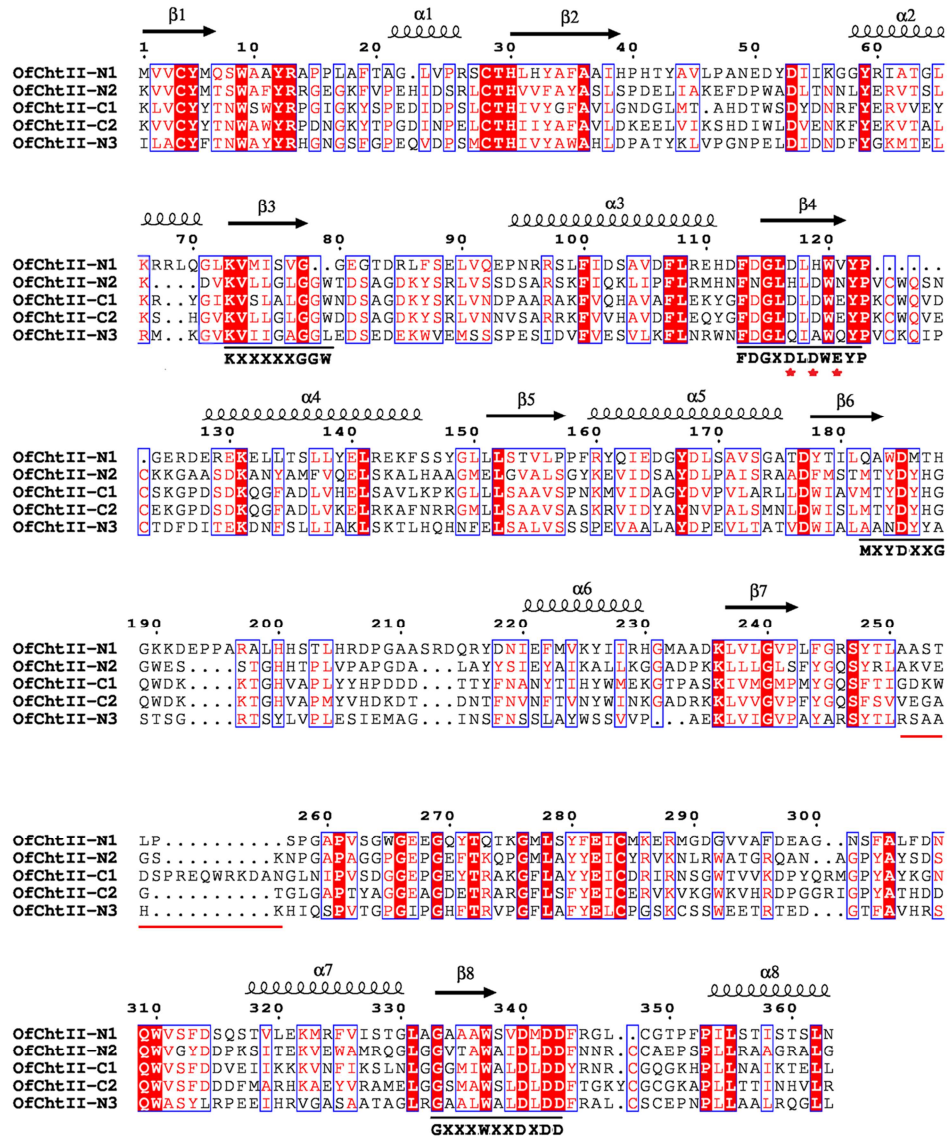

**Figure S2.** Multiple sequence alignment of *OfChtII* catalytic domains. Sequence alignment of five deduced catalytic domains of *OfChtII*, made with ESPrpt. The secondary structure of the core TIM barrel and the highly conserved motifs are indicated. Catalytic residues are indicated by asterisk. The residues replaced during *OfChtII-C1* crystallization are indicated by red line.

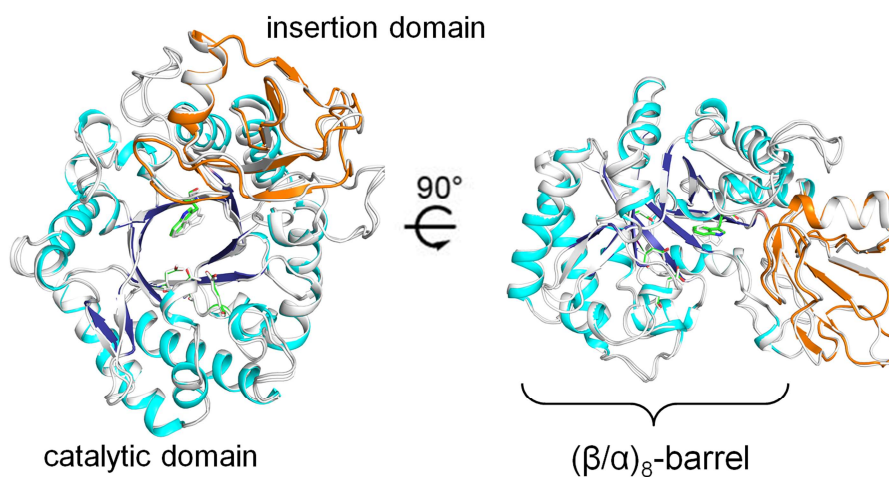

**Figure S3.** Structural comparison of *OfChtII-C1* and *OfChtII-C2*.

Two perpendicular views of superimposed *OfChtII-C1* and *OfChtII-C2* reveal that the catalytic domains are folded into an identical  $(\beta/\alpha)_8$ -barrel, while the insertion domains display a slight variation. *OfChtII-C2* is colored white; the  $\alpha$ -helices and  $\beta$ -strands of catalytic domain for *OfChtII-C1* are colored cyan and blue, respectively. The insertion domain of *OfChtII-C1* are colored orange. The catalytic residues and Trp<sup>1961</sup> of *OfChtII-C1* are shown as sticks with green carbon atoms.

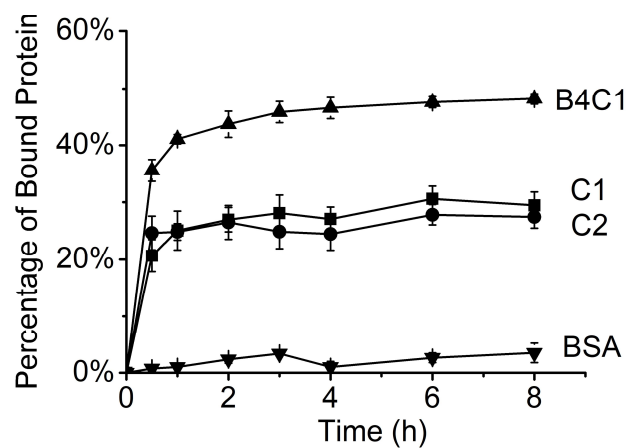

**Figure S4.** The binding affinity of *OfChtII* truncations. The concentration of free protein in the supernatant was determined at different time points after incubation with  $\alpha$ -chitin. The results are the average of three independent repeats, with the standard deviations indicated.

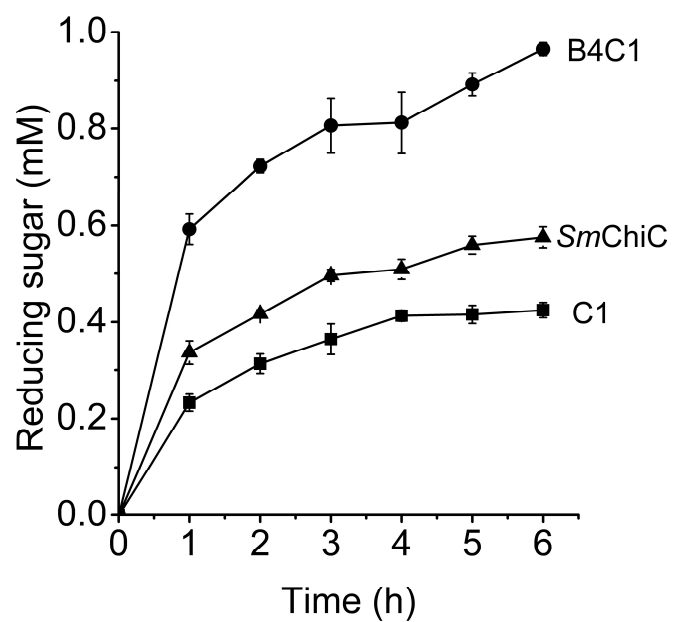

**Figure S5.** The comparison of hydrolysis activity towards  $\alpha$ -chitin between *SmChiC* and *OfChtII* truncates.

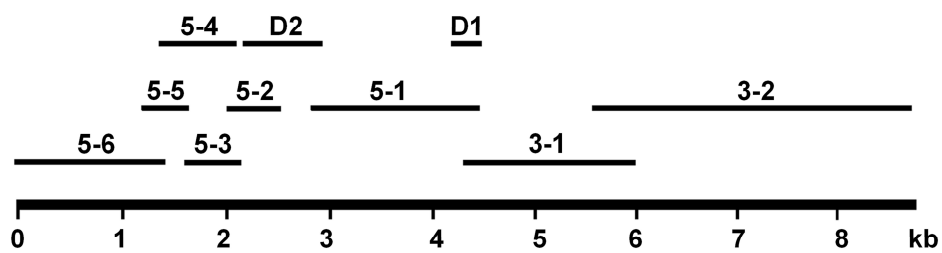

**Figure S6.** The overall strategy used in the gene cloning of *OfChtII*
